# Supplementary material for: Ultrastable fluoropolymer-based porous conductive elastomer composites (PVDF–HFP/CB) for high-sensitivity pressure sensing applications
Source: Royal Society of Chemistry journal article supplement (doi:10.1039/d5tc01323b), 2025-01-01
Supplement: d5tc01323b1.pdf [file d5tc01323b1.pdf]

# **Ultrastable Fluoropolymer-Based Porous Conductive Elastomer Composites (PVDF-HFP/CB) for High-Sensitivity Pressure Sensing Applications**

Sanfa Xie<sup>1</sup>, Yaoqi Wei<sup>1</sup>, Yaping Zhang<sup>1</sup>, Wei Zhu<sup>1</sup>, Xiangfei Liang<sup>1,\*</sup>

<sup>†</sup>Institute of Carbon Neutral New Energy Research, Yuzhang Normal University,  
Nanchang 330031, China

\*Corresponding authors: xfliang96@163.com (X. Liang)

### *Sensor Testing Platform*

The testing platform for the sensors developed in this study is illustrated in Figure 1. Fig. S1(a) shows the data acquisition card (2001-TCSCAN), Fig. S1(b) depicts the digital multimeter (DMM6500), Fig. S1(c) presents the universal material testing machine (E1000), and Fig. S1(d) features the data acquisition software (Kickstart). The data acquisition card (2001-TCSCAN) is a 10-channel thermocouple relay that can simultaneously collect signals from multiple channels. The digital multimeter (DMM6500), produced by Keithley, is a multifunctional measuring instrument with testing capabilities that include capacitance, voltage, current, and resistance measurements. The universal material testing machine (E1000), manufactured by Instron, is a fully electric dynamic testing apparatus with a load measurement range of  $\pm 1000$  N and a sensor accuracy of  $\pm 0.5\%$ . Kickstart is a data acquisition software that, when connected with the data acquisition card (2001-TCSCAN) and the universal material testing machine (E1000), can display the sensor's real-time strain, stress, and resistance values.

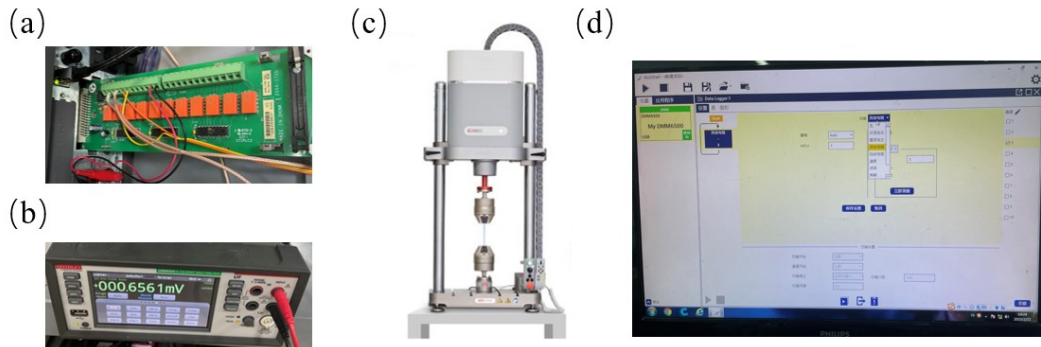

**Fig. S1** (a) Data acquisition card (2001-TCSCAN); (b) Digital multimeter (DMM6500); (c) Universal material testing machine (E1000); (d) Kickstart software interface.

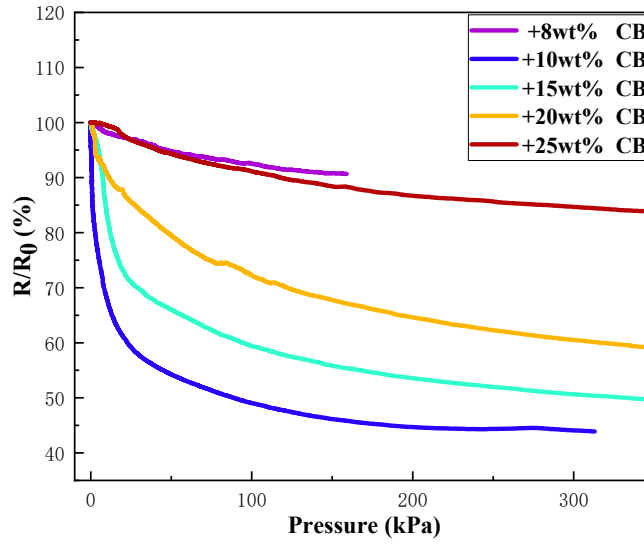

**Fig. S2** Electrical performance of sensors with different mass ratios of carbon black

Our systematic investigation of CB mass ratios in PVDF-HFP/CB composite sensors revealed a critical threshold for optimal electromechanical response. As the CB content decreased from 25% to 10% mass ratio, the relative resistance change ( $R/R_0$ ) under equivalent pressure conditions exhibited a huge enhancement, demonstrating improved pressure sensitivity as shown in Fig. S2. Notably, this trend reversed abruptly when CB concentration dropped below 8%, with  $R/R_0$  values decreasing significantly. Complete loss of electrical conductivity occurred at 5% CB content, transitioning the composite to insulating behavior. This nonlinear relationship between CB concentration and sensor performance aligns with percolation theory, where 10% CB represents the optimal balance between maintaining conductive networks and achieving high strain-induced resistance variation.

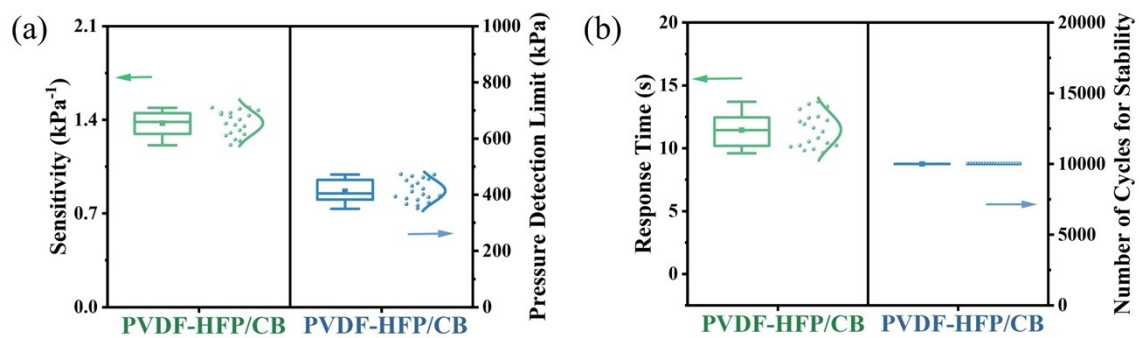

**Fig. S3** Statistical sensitivity, detection range range, response time, and cycle stability times of sensor w/ PVDF-HFP/CB.

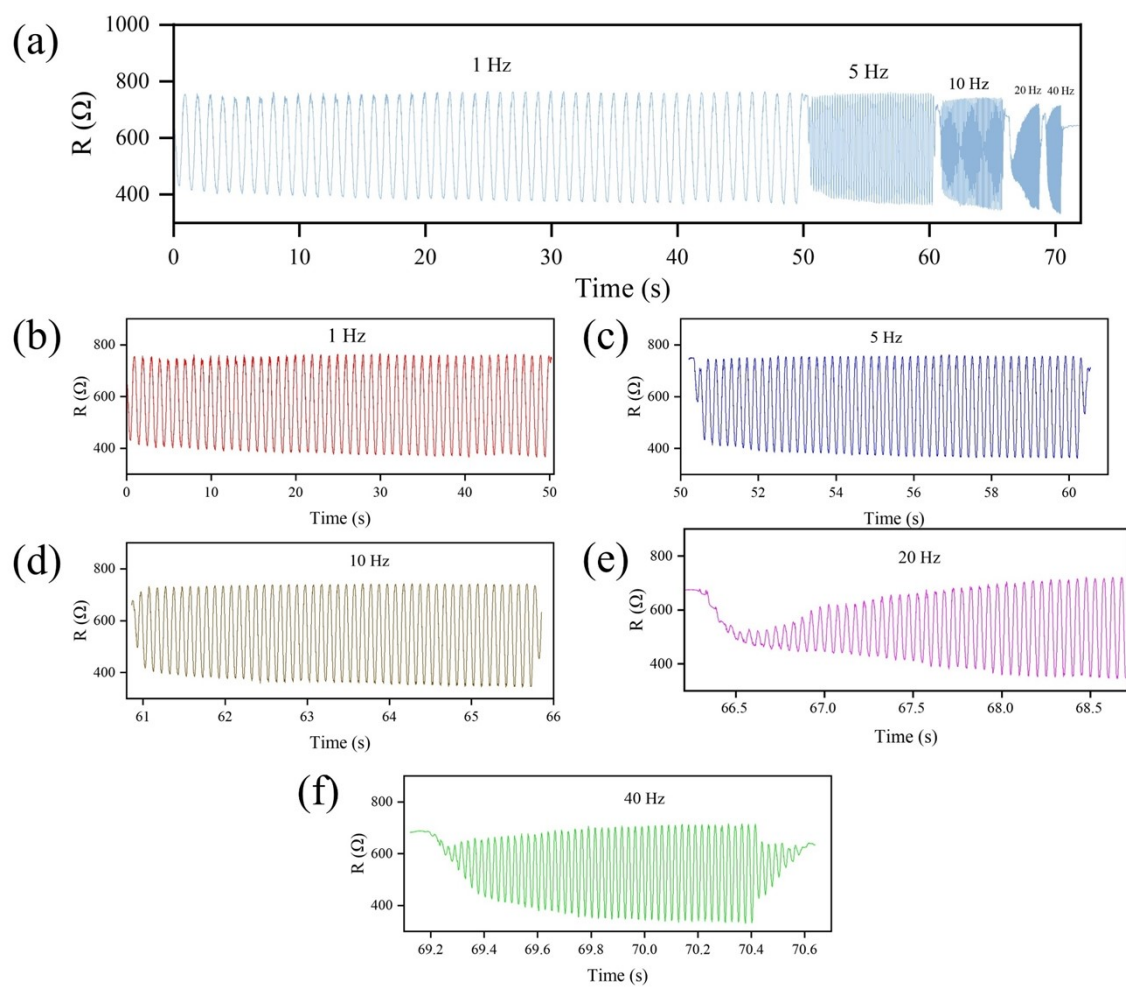

**Fig. S4** Dynamic response tests at different frequencies (a) Continuous testing process of the sensor at different frequencies (b) 1Hz (c) 5Hz (d) 10 Hz (e) 20Hz (f) 40Hz
